# Supplementary material
Source: PubMed Central journal article supplement (PMC4835307)
Supplement: aasm.39.5.1083s1.pdf [file aasm.39.5.1083s1.pdf]

Figure S1

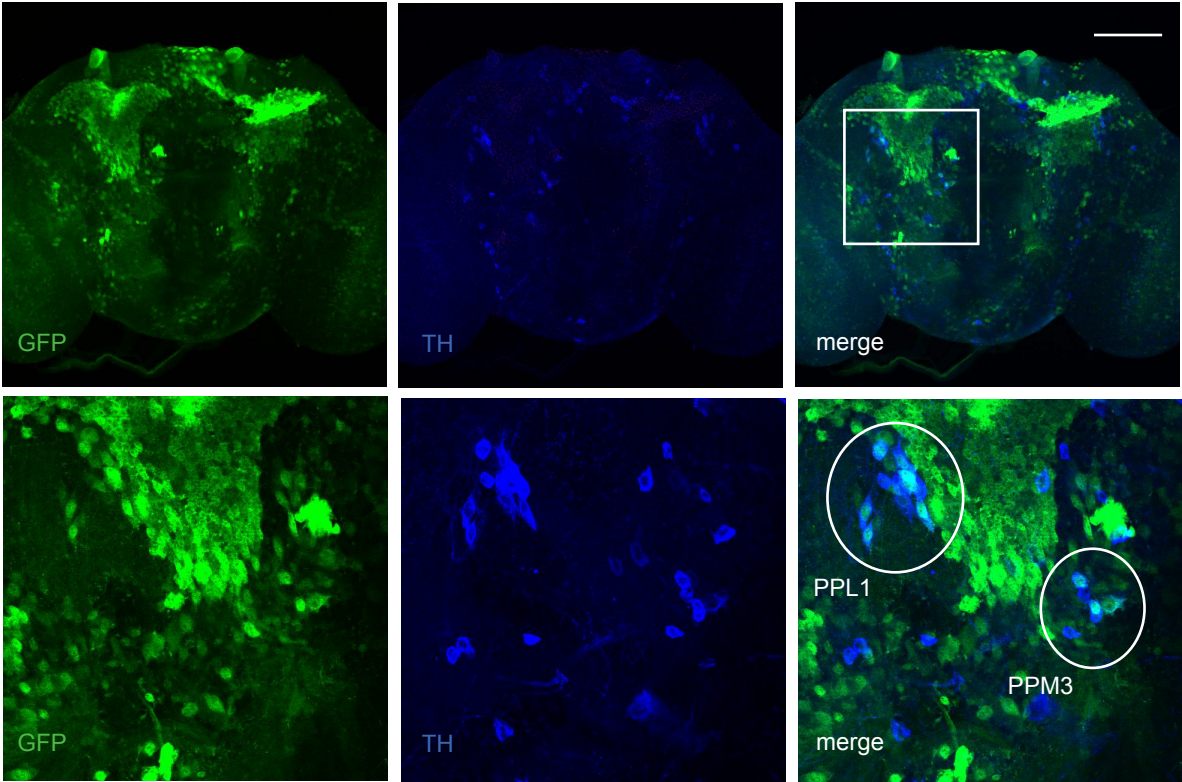

**Figure S1.** Coexpression of 104906-Gal4 with dopaminergic cells  
104906-Gal4>UAS-nGFP brains exhibit widespread GFP expression. Costaining with an anti-TH antibody reveals coexpression of GFP and TH in the PPL1 and PPM3 clusters. Scale bar = 100  $\mu$ m.

Figure S2

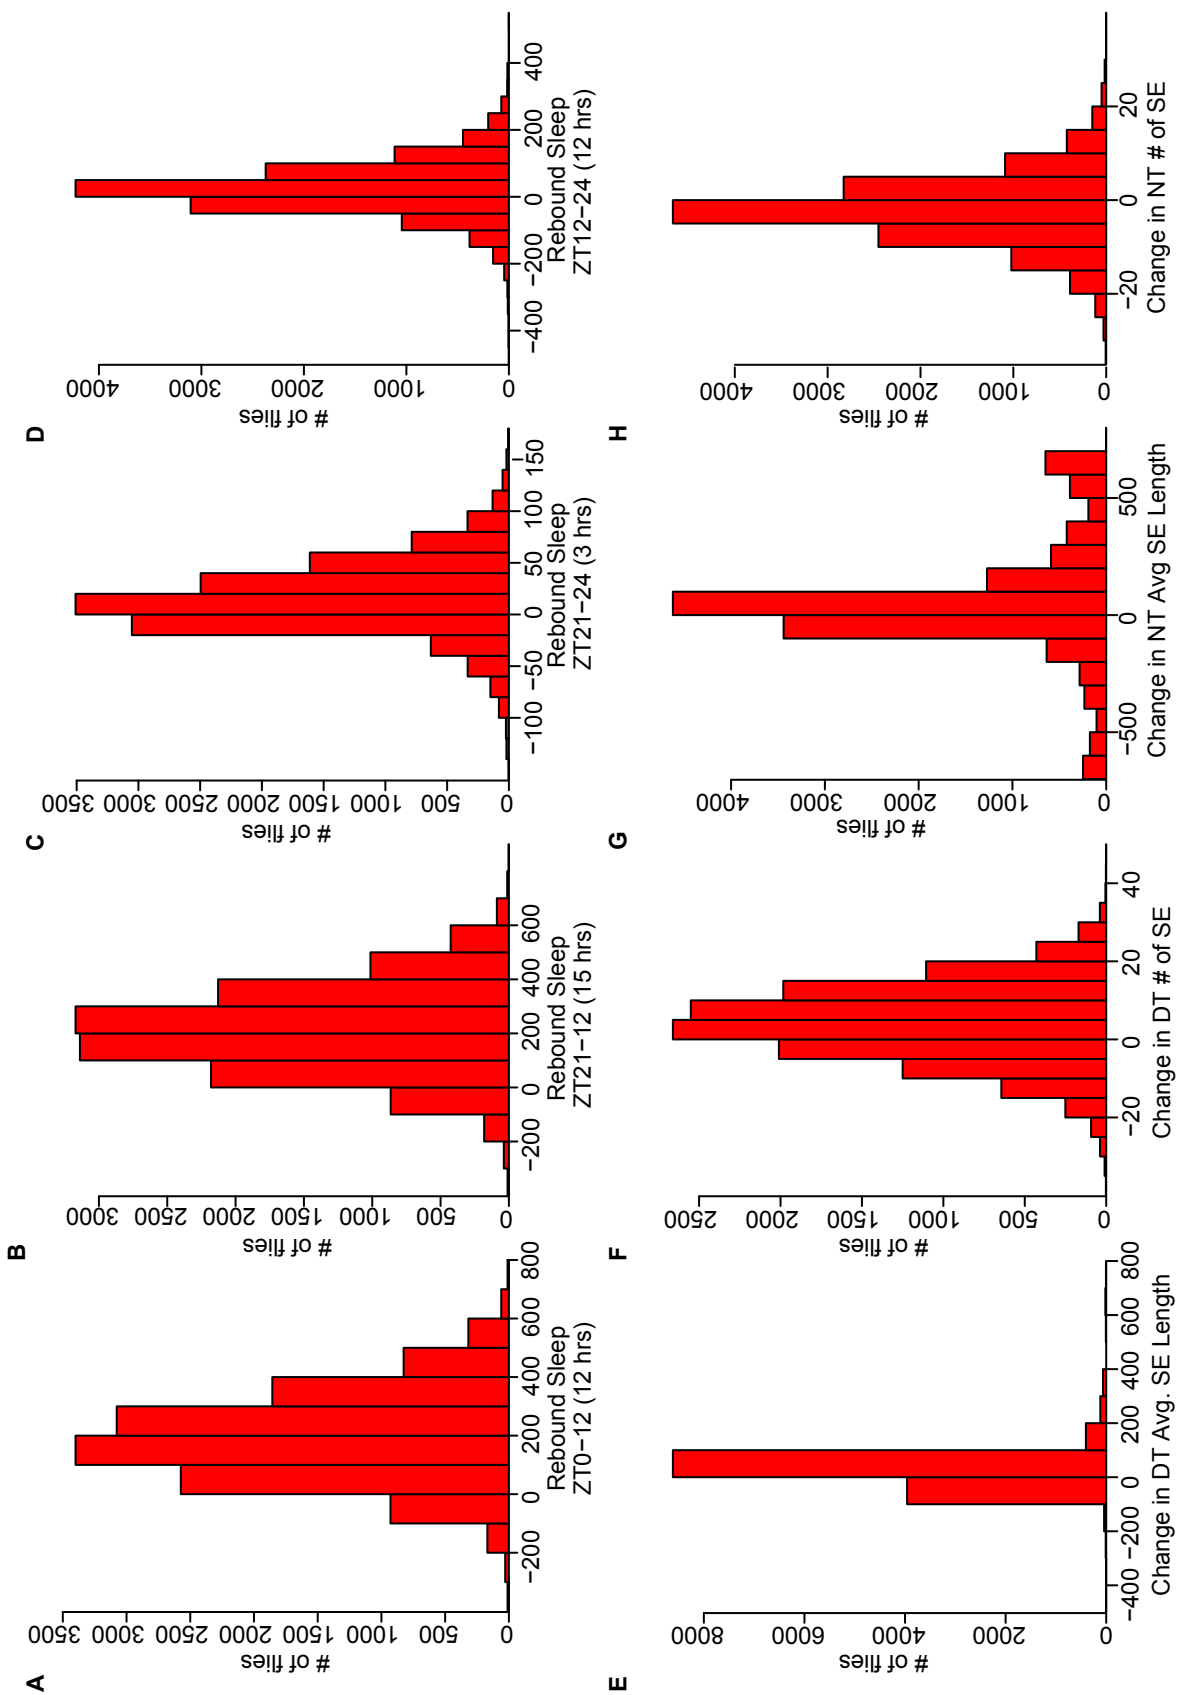

**Figure S2.** Changes in sleep parameters after thermogenetic sleep deprivation. **(A-D)** Histograms showing change in sleep amount for individual flies in the primary screen. An increase in sleep amount (rebound) relative to baseline is observed from Zeitgeber time (ZT)0-12 **(A)** and over the 15-h period from ZT21-12 in almost all flies **(B)**. Net rebound sleep during the 3 h immediately following sleep deprivation (ZT21-24) **(C)** and the first full night following sleep deprivation (ZT12-24) **(D)** can also be observed, but are less consistent, with many flies showing the opposite trend. **(E-H)** Histograms showing change in sleep bout architecture for individual flies in primary screen. During the day, flies tend to have longer **(E)** and a greater number **(F)** of sleep bouts following sleep deprivation. During the following night, sleep becomes more consolidated, with longer bouts **(G)** and fewer of them **(H)**. As with some of the sleep amount parameters discussed here, these trends are observed for the data set as a whole, but are not consistent across individual flies, with many flies exhibiting the opposite relationship.

**Figure S3**

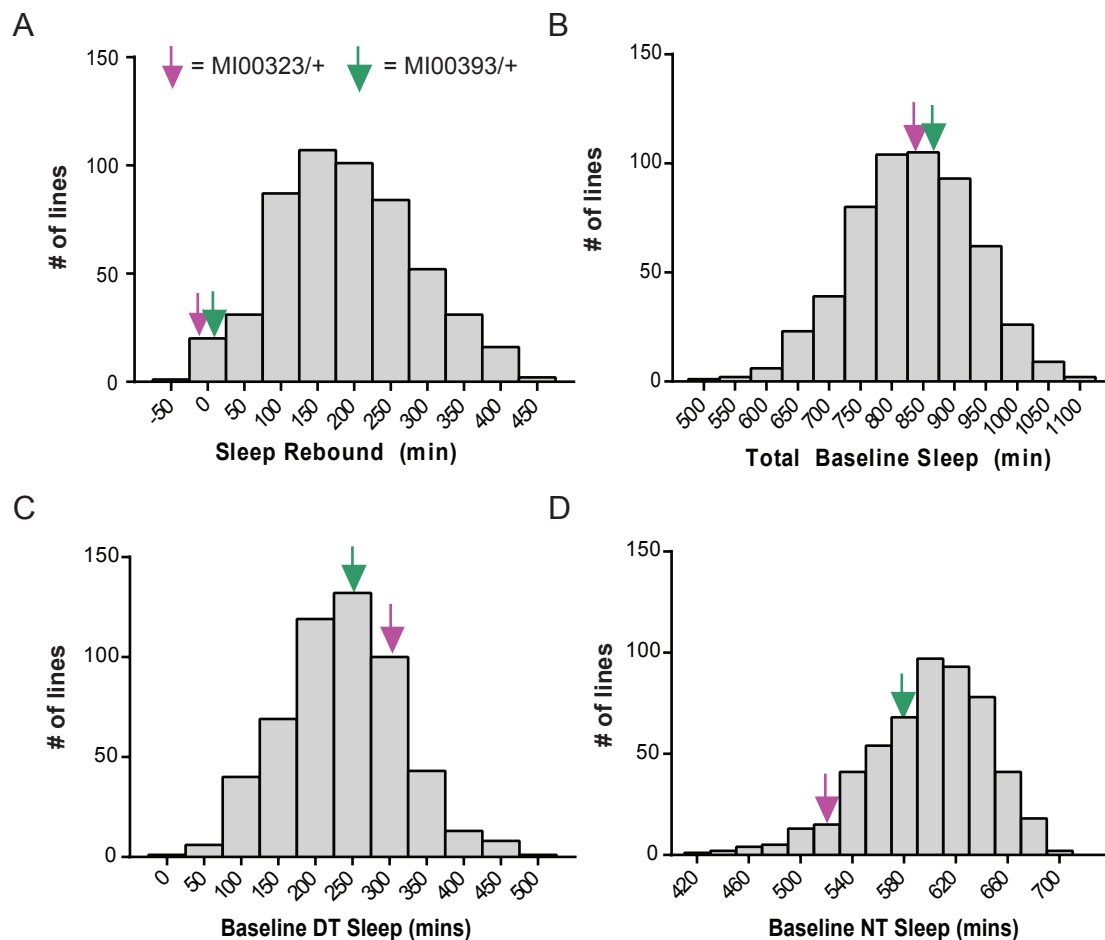

**Figure S3.** Baseline sleep is not reduced in hits with reduced rebound compared to other MiMIC lines tested in the screen. **(A-D)** Histograms depicting values for **(A)** sleep recovered (Zeitgeber time 21-12) **(B)** total baseline sleep amount, **(C)** baseline daytime (DT) and **(D)** baseline nighttime (NT) sleep for all MiMIC lines run as heterozygotes in the screen. Arrows depict baseline sleep for MI00323/+ and MI00393/+ in the first four independent experiments for each of these lines, run in parallel with the primary screen. Overall baseline sleep values for MI00323/+ and MI00393/+ are within the normal range compared to other lines tested in the screen. We do observe a shift in the timing of sleep for MI00323/+ toward greater DT sleep, which we discuss in more detail later. Although in this data set we observe a reduction in baseline NT sleep for MI00323/+, we do not see significant differences in baseline NT sleep between this line and a control line discussed in Figure 4.

Figure S4

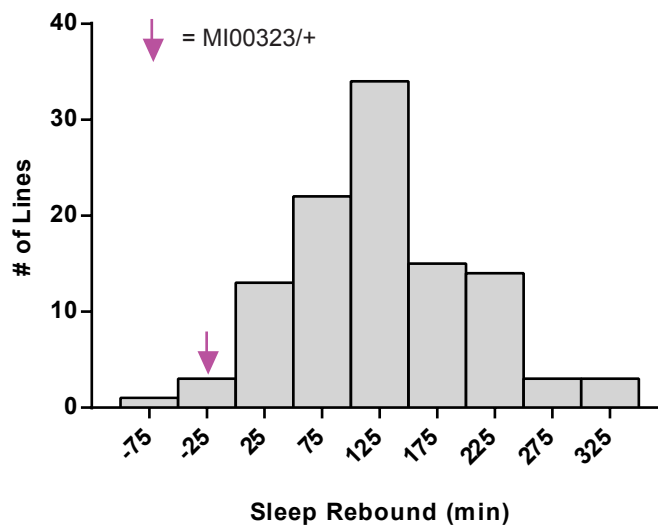

**Figure S4.** Histogram of rebound sleep for all heterozygous MiMIC lines that displayed high daytime baseline sleep (>300 min). In the primary screen MI00323/+ did not have daytime sleep above 300 min but would have still been an outlier for recovery sleep when compared with other MiMIC insertions with high daytime baseline sleep.

Figure S5

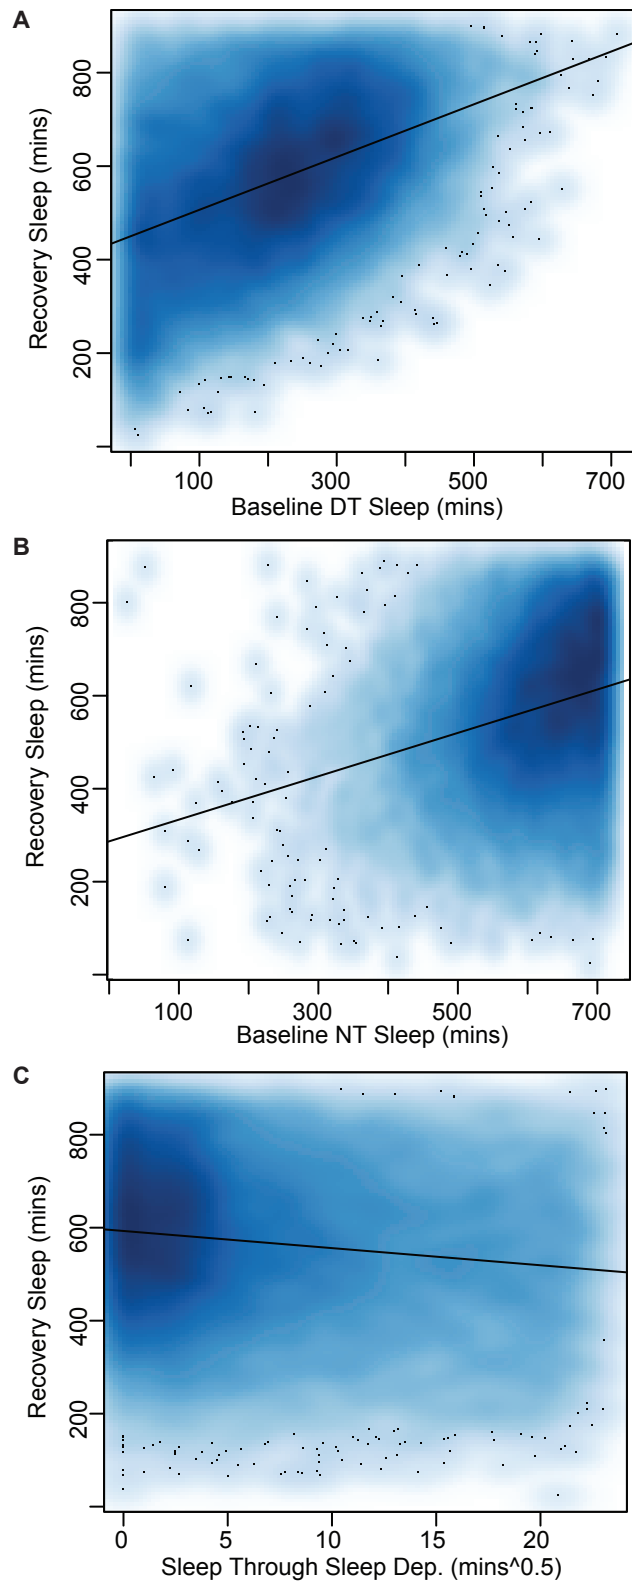

**Figure S5.** Relationships of recovery sleep with baseline sleep and sleep through thermogenetic sleep deprivation. **(A-C)** Smoothed scatter plots depict relationships between sleep during the recovery period and **(A)** baseline daytime (DT) sleep **(B)** baseline nighttime (NT) sleep and **(C)** square root transformation (see Table 3) of sleep through the thermogenetic stimulation (sleep through sleep deprivation) in primary screen.

**Table S1**

|        | # Genotypes | # Flies | Sleep Lost    | Sleep Rebound (15hrs) | Baseline Sleep (Night) | Baseline Sleep (Day) | Sleep Through Sleep Dep. | Recovery Sleep (15hrs) |
|--------|-------------|---------|---------------|-----------------------|------------------------|----------------------|--------------------------|------------------------|
| KG het | 308         | 2340    | 441.8 ± 74.1  | 227.8 ± 144.6         | 607.1 ± 68.8           | 248.7 ± 107.4        | 24 ± 56.1                | 617.6 ± 147.9          |
| KG III | 263         | 1923    | 285.2 ± 155.8 | 222.7 ± 162.6         | 638.4 ± 73.3           | 199.8 ± 124.9        | 192.2 ± 160.9            | 583.2 ± 166.5          |
| KG X   | 141         | 1019    | 336.3 ± 138   | 207.8 ± 149.4         | 527.3 ± 114.1          | 209.4 ± 119          | 59.5 ± 109.4             | 548.7 ± 156.4          |
| MI het | 566         | 4343    | 413.5 ± 100.9 | 195.8 ± 152.9         | 596.1 ± 80.1           | 229.7 ± 117          | 40.8 ± 79.5              | 567.3 ± 148.8          |
| MI III | 430         | 3177    | 356.8 ± 138   | 206.1 ± 161.8         | 631.9 ± 84.6           | 162.7 ± 132.4        | 116.7 ± 129              | 527.2 ± 180            |
| MI X   | 58          | 443     | 362 ± 118.7   | 270.3 ± 172.7         | 536.9 ± 103.2          | 229.1 ± 121.2        | 51.3 ± 91.4              | 621.7 ± 152            |

Summary statistics (mean ± standard deviation, all values in minutes) for all collections of insertions screened. "Het" designates heterozygous insertion mutants and III and X indicate homozygous insertions on the 3rd and X chromosomes.



**Table S2**

| Group    | Variable                                         | $\beta$ coefficient | Standard Error | P-value |
|----------|--------------------------------------------------|---------------------|----------------|---------|
| MI Het   | Intercept (mins)                                 | 567.3               | 2.01           | <0.001  |
| MI Het   | Daytime Sleep                                    | 0.40                | 0.018          | <0.001  |
| MI Het   | Nighttime Sleep                                  | 0.49                | 0.026          | <0.001  |
| MI Het   | Sleep Through Sleep Dep.* (mins <sup>0.5</sup> ) | -4.07               | 0.434          | <0.001  |
|          |                                                  |                     |                |         |
| MI (III) | Intercept (mins)                                 | 527.2               | 2.67           | <0.001  |
| MI (III) | Daytime Sleep                                    | 0.66                | 0.021          | <0.001  |
| MI (III) | Nighttime Sleep                                  | 0.40                | 0.032          | <0.001  |
| MI (III) | Sleep Through Sleep Dep.* (mins <sup>0.5</sup> ) | -5.67               | 0.449          | <0.001  |
|          |                                                  |                     |                |         |
| MI (X)   | Intercept (mins)                                 | 621.7               | 6.65           | <0.001  |
| MI (X)   | Daytime Sleep                                    | 0.19                | 0.058          | <0.001  |
| MI (X)   | Nighttime Sleep                                  | 0.47                | 0.068          | 0.0011  |
| MI (X)   | Sleep Through Sleep Dep.* (mins <sup>0.5</sup> ) | -3.99               | 1.247          | 0.0015  |
|          |                                                  |                     |                |         |
| KG het   | Intercept (mins)                                 | 617.6               | 2.70           | <0.001  |
| KG het   | Daytime Sleep                                    | 0.47                | 0.026          | <0.001  |
| KG het   | Nighttime Sleep                                  | 0.52                | 0.041          | <0.001  |
| KG het   | Sleep Through Sleep Dep.* (mins <sup>0.5</sup> ) | -4.98               | 0.707          | <0.001  |
|          |                                                  |                     |                |         |
| KG (III) | Intercept (mins)                                 | 583.2               | 3.1            | <0.001  |
| KG (III) | Daytime Sleep                                    | 0.53                | 0.025          | <0.001  |
| KG (III) | Nighttime Sleep                                  | 0.59                | 0.045          | <0.001  |
| KG (III) | Sleep Through Sleep Dep.* (mins <sup>0.5</sup> ) | -9.92               | 0.469          | <0.001  |
|          |                                                  |                     |                |         |
| KG (X)   | Intercept (mins)                                 | 548.66              | 4.23           | <0.001  |
| KG (X)   | Daytime Sleep                                    | 0.47                | 0.039          | <0.001  |
| KG (X)   | Nighttime Sleep                                  | 0.33                | 0.041          | <0.001  |
| KG (X)   | Sleep Through Sleep Dep.* (mins <sup>0.5</sup> ) | -2.67               | 0.756          | <0.001  |

Regression of recovery sleep against daytime and nighttime baseline sleep and sleep through sleep deprivation for each collection of insertions screened. \* = square root transformation. Baseline daytime (DT) sleep, baseline nighttime (NT) sleep, and sleep through the thermogenetic stimulation (sleep through sleep dep.) were regressed on recovery sleep in a multiple linear regression model.  $\beta$  coefficients and standard error for coefficients are reported in the table.

**Table S3**

| Group    | Model         | Variable                 | RMSE (mins) | R <sup>2</sup> | adjusted R <sup>2</sup> | ΔRMSE (mins) | ΔR <sup>2</sup> | Δadjusted R <sup>2</sup> |
|----------|---------------|--------------------------|-------------|----------------|-------------------------|--------------|-----------------|--------------------------|
| MI Het   | Reduced Model | Intercept                | 148.8       | -              | -                       | -            | -               | -                        |
| MI Het   | Reduced Model | Experimental Run         | 139.6       | 0.124          | 0.120                   | 9.2          | 0.124           | 0.120                    |
| MI Het   | Reduced Model | Genotype                 | 122.1       | 0.414          | 0.327                   | 17.5         | 0.290           | 0.207                    |
| MI Het   | Full Model    | Intercept                | 148.8       | -              | -                       | -            | -               | -                        |
| MI Het   | Full Model    | Daytime Sleep            | 139.0       | 0.128          | 0.127                   | 9.8          | 0.128           | 0.127                    |
| MI Het   | Full Model    | Nighttime Sleep          | 134.0       | 0.190          | 0.190                   | 5.0          | 0.062           | 0.062                    |
| MI Het   | Full Model    | Sleep Through Sleep Dep* | 132.7       | 0.206          | 0.205                   | 1.3          | 0.016           | 0.016                    |
| MI Het   | Full Model    | Experimental Run         | 126.5       | 0.281          | 0.277                   | 6.2          | 0.075           | 0.072                    |
| MI Het   | Full Model    | Genotype                 | 112.7       | 0.502          | 0.427                   | 13.8         | 0.220           | 0.149                    |
| MI (III) | Reduced Model | Intercept                | 180.0       | -              | -                       | -            | -               | -                        |
| MI (III) | Reduced Model | Experimental Run         | 174.5       | 0.066          | 0.060                   | 5.5          | 0.066           | 0.060                    |
| MI (III) | Reduced Model | Genotype                 | 144.3       | 0.444          | 0.358                   | 30.3         | 0.378           | 0.298                    |
| MI (III) | Full Model    | Intercept                | 180.0       | -              | -                       | -            | -               | -                        |
| MI (III) | Full Model    | Daytime Sleep            | 157.1       | 0.238          | 0.238                   | 22.9         | 0.238           | 0.238                    |
| MI (III) | Full Model    | Nighttime Sleep          | 154.3       | 0.265          | 0.265                   | 2.8          | 0.027           | 0.027                    |
| MI (III) | Full Model    | Sleep Through Sleep Dep* | 150.6       | 0.300          | 0.300                   | 3.7          | 0.035           | 0.035                    |
| MI (III) | Full Model    | Experimental Run         | 147.9       | 0.330          | 0.325                   | 2.7          | 0.029           | 0.025                    |
| MI (III) | Full Model    | Genotype                 | 128.7       | 0.559          | 0.489                   | 19.2         | 0.229           | 0.164                    |
| MI (X)   | Reduced Model | Intercept                | 152.0       | -              | -                       | -            | -               | -                        |
| MI (X)   | Reduced Model | Genotype                 | 136.9       | 0.29           | 0.19                    | 15.1         | 0.293           | 0.189                    |
| MI (X)   | Full Model    | Intercept                | 152.0       | -              | -                       | -            | -               | -                        |
| MI (X)   | Full Model    | Daytime Sleep            | 148.3       | 0.050          | 0.048                   | 3.7          | 0.050           | 0.048                    |
| MI (X)   | Full Model    | Nighttime Sleep          | 141.4       | 0.138          | 0.134                   | 6.8          | 0.087           | 0.085                    |
| MI (X)   | Full Model    | Sleep Through Sleep Dep* | 140.0       | 0.157          | 0.152                   | 1.5          | 0.020           | 0.018                    |
| MI (X)   | Full Model    | Genotype                 | 123.8       | 0.427          | 0.336                   | 16.2         | 0.269           | 0.185                    |

Variance explained by variables in a hierarchical multiple linear regression model for each collection of insertions screened. \* = square root transformation. For both the reduced model and the full model, variables were added hierarchically in the order listed based on expected biological relationships. The total Root Mean Square Error (RMSE), R<sup>2</sup>, and adjusted R<sup>2</sup> for the models after the addition of each variable, and the change in these values compared to the model without the variable are reported. All reported variables significantly improved the model with p<0.001 (variance ratio test).

**Table S3 (con't)**

| Group    | Model         | Variable                  | RMSE (mins) | R <sup>2</sup> | adjusted R <sup>2</sup> | ΔRMSE (mins) | ΔR <sup>2</sup> | Δadjusted R <sup>2</sup> |
|----------|---------------|---------------------------|-------------|----------------|-------------------------|--------------|-----------------|--------------------------|
| KG Het   | Reduced Model | Intercept                 | 147.9       | -              | -                       | -            | -               | -                        |
| KG Het   | Reduced Model | Experimental Run          | 142.6       | 0.075          | 0.071                   | 5.4          | 0.075           | 0.071                    |
| KG Het   | Reduced Model | Genotype                  | 116.4       | 0.462          | 0.381                   | 26.2         | 0.387           | 0.310                    |
| KG Het   | Full Model    | Intercept                 | 147.9       | -              | -                       | -            | -               | -                        |
| KG Het   | Full Model    | Daytime Sleep             | 135.7       | 0.159          | 0.158                   | 12.2         | 0.159           | 0.158                    |
| KG Het   | Full Model    | Nighttime Sleep           | 131.8       | 0.206          | 0.206                   | 3.9          | 0.047           | 0.047                    |
| KG Het   | Full Model    | Sleep Through Sleep Dep.* | 130.5       | 0.223          | 0.222                   | 1.3          | 0.016           | 0.016                    |
| KG Het   | Full Model    | Experimental Run          | 125.3       | 0.287          | 0.283                   | 5.2          | 0.064           | 0.061                    |
| KG Het   | Full Model    | Genotype                  | 106.1       | 0.553          | 0.485                   | 19.1         | 0.266           | 0.202                    |
| KG (III) | Reduced Model | Intercept                 | 166.5       | -              | -                       | -            | -               | -                        |
| KG (III) | Reduced Model | Experimental Run          | 163.8       | 0.037          | 0.031                   | 2.6          | 0.037           | 0.031                    |
| KG (III) | Reduced Model | Genotype                  | 134.3       | 0.438          | 0.349                   | 29.6         | 0.401           | 0.318                    |
| KG (III) | Full Model    | Intercept                 | 166.5       | -              | -                       | -            | -               | -                        |
| KG (III) | Full Model    | Daytime Sleep             | 152.0       | 0.166          | 0.166                   | 14.4         | 0.166           | 0.166                    |
| KG (III) | Full Model    | Nighttime Sleep           | 150.1       | 0.188          | 0.187                   | 1.9          | 0.022           | 0.021                    |
| KG (III) | Full Model    | Sleep Through Sleep Dep.* | 135.2       | 0.341          | 0.340                   | 14.9         | 0.154           | 0.153                    |
| KG (III) | Full Model    | Experimental Run          | 132.0       | 0.376          | 0.371                   | 3.2          | 0.034           | 0.031                    |
| KG (III) | Full Model    | Genotype                  | 116.0       | 0.581          | 0.514                   | 16.0         | 0.206           | 0.143                    |
| KG (X)   | Reduced Model | Intercept                 | 156.4       | -              | -                       | -            | -               | -                        |
| KG (X)   | Reduced Model | Experimental Run          | 151.9       | 0.062          | 0.056                   | 4.5          | 0.062           | 0.056                    |
| KG (X)   | Reduced Model | Genotype                  | 138.0       | 0.328          | 0.221                   | 13.9         | 0.266           | 0.165                    |
| KG (X)   | Full Model    | Intercept                 | 156.4       | -              | -                       | -            | -               | -                        |
| KG (X)   | Full Model    | Daytime Sleep             | 140.1       | 0.199          | 0.198                   | 16.3         | 0.199           | 0.198                    |
| KG (X)   | Full Model    | Nighttime Sleep           | 135.9       | 0.246          | 0.245                   | 4.2          | 0.048           | 0.047                    |
| KG (X)   | Full Model    | Sleep Through Sleep Dep.* | 135.1       | 0.256          | 0.253                   | 0.8          | 0.009           | 0.008                    |
| KG (X)   | Full Model    | Experimental Run          | 132.9       | 0.284          | 0.277                   | 2.2          | 0.028           | 0.024                    |
| KG (X)   | Full Model    | Genotype                  | 123.8       | 0.461          | 0.373                   | 9.1          | 0.177           | 0.096                    |
